# Supplementary figures and images for: Overexpression of TRIM24 Stimulates Proliferation and Glucose Metabolism of Head and Neck Squamous Cell Carcinoma
Source: Hindawi journal article supplement (doi:10.1155/2018/6142843), 2018-01-01

A

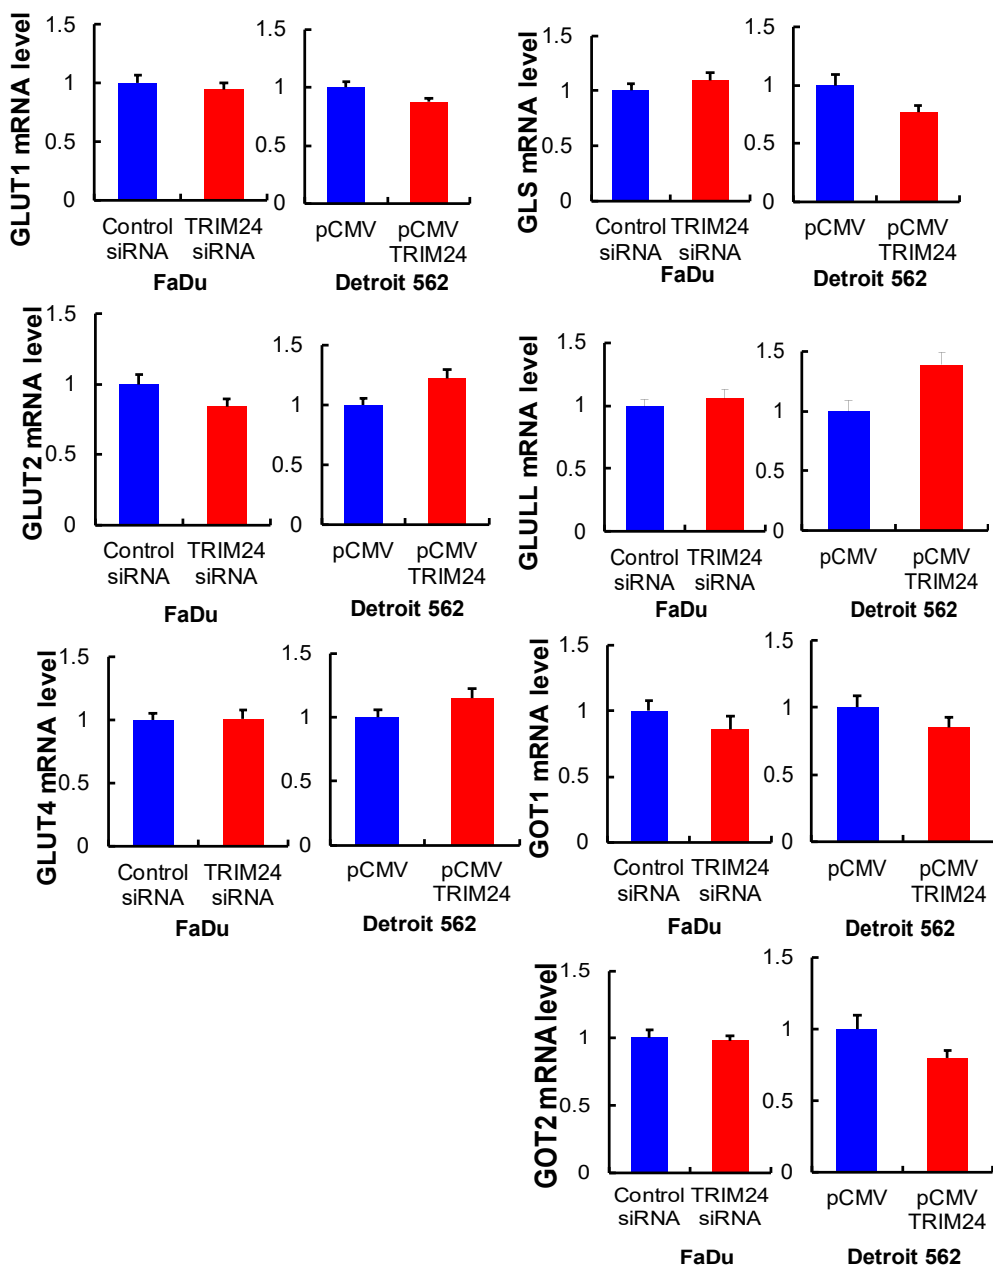

B

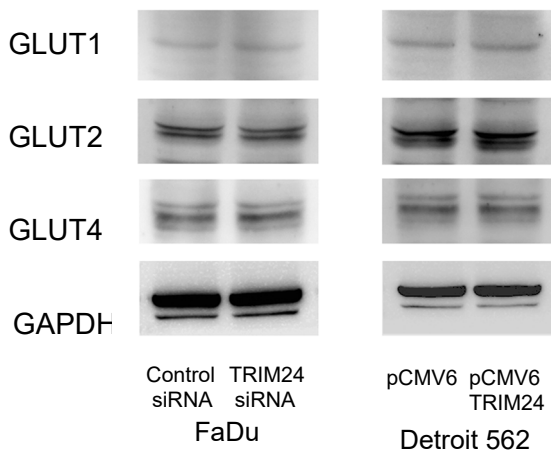

Supplement: f1 [file 6142843.f1.ai]
